# Supplementary material
Source: PubMed Central journal article supplement (PMC4361899)
Supplement: NIHMS665231-supplement-Suppl_Fig_.pdf [file NIHMS665231-supplement-Suppl_Fig_.pdf]

**R492**

**T512**

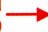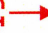

```

Bos taurus 471 FSLQKSVLGVITIVNLRGALCKFKDLPQMWIRISRMDTVIWFVTMLSSA 518 (Cow)
Canis familiaris 336 YSLQKSVLGVITIVNLRGALRKFKDLPKMWKVSRRMDTVIWFVTMLSSA 383 (Dog)
Homo sapiens 476 YSLQKSVLGVITIVNLRGALRKFDRDLPKMWSISRMDTVIWFVTMLSSA 523 (Human)
Pan troglodytes 476 YSLQKSVLGVITIVNLRGALRKFDRDLPKMWSISRMDTVIWFVTMLSSA 523 (Chimpanzee)
Macaca mulata 164 YSLQKSVLAVITIVNLRGALRKFDRDLPKMWNISRMDTVIWFVTMLSSA 211 (Macaque)
Mus musculus 476 YSLQKCVLGVITIVNLRGALLKFRDLPKMWRLSRMDTVIWFVTMLSSA 523 (Mouse)
Rattus norvegicus 476 YSLQKCVLGVITIVNLRGALLKFRDLPKMWRLSRMDTVIWFVTMLSSA 523 (Rat)
:***. **.***** **;***:** :*****
Con

```
